# Supplementary figures and images for: Microbiome-metabolomics deciphers the effects of Cistanche deserticola polysaccharides on aged constipated rats
Source: Royal Society of Chemistry journal article supplement (doi:10.1039/d2fo00008c), 2022-01-01

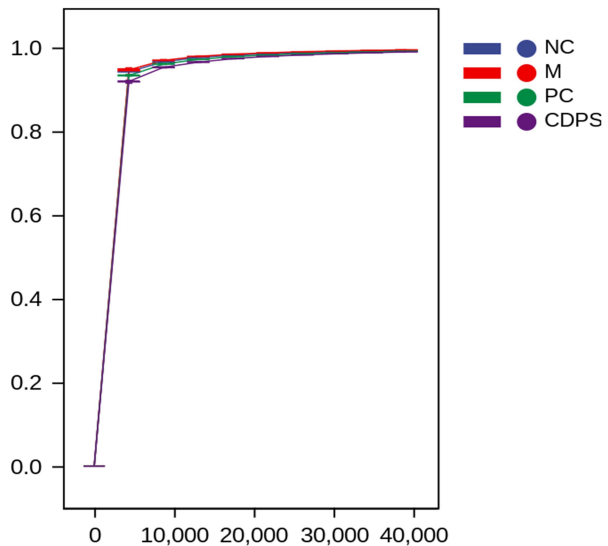

A

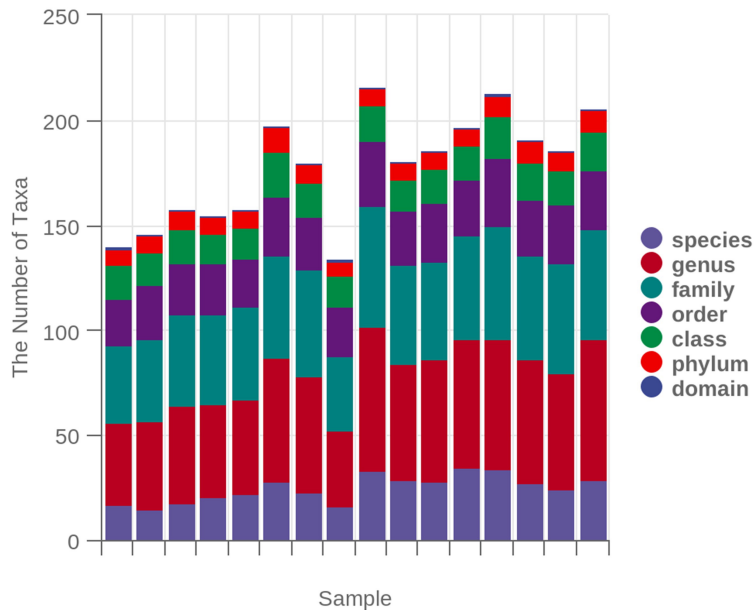

B

Supplement: d2fo00008c4.pdf [file d2fo00008c4.pdf]

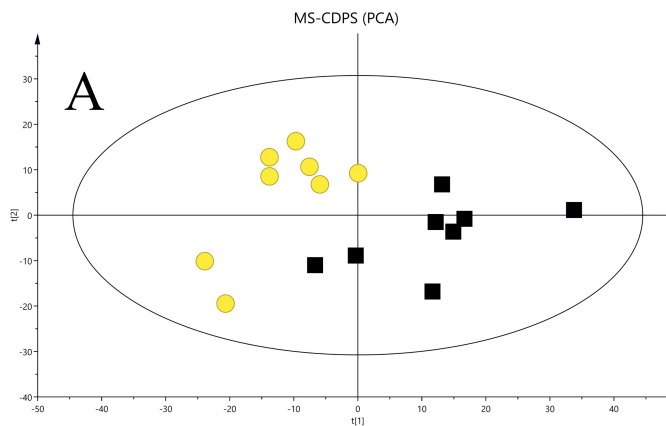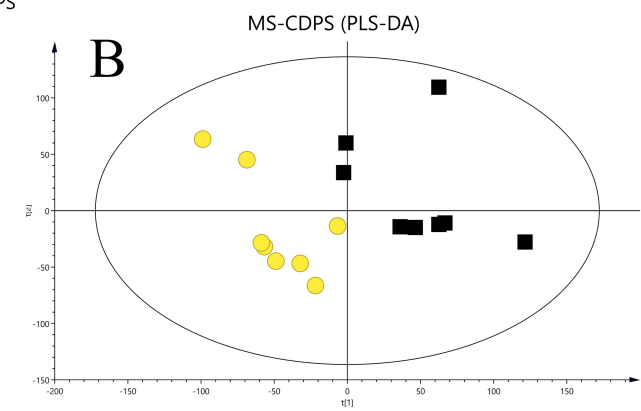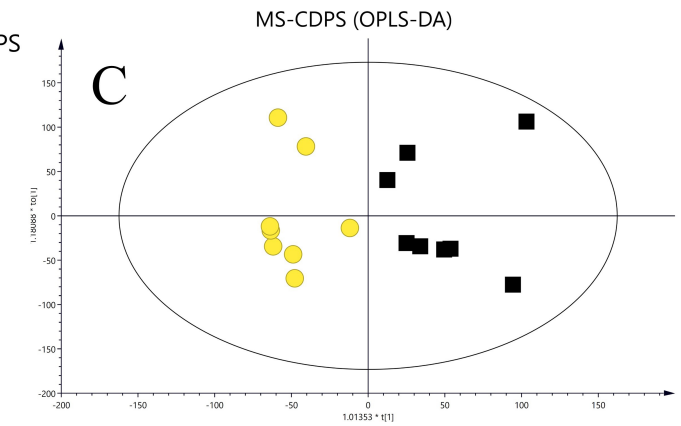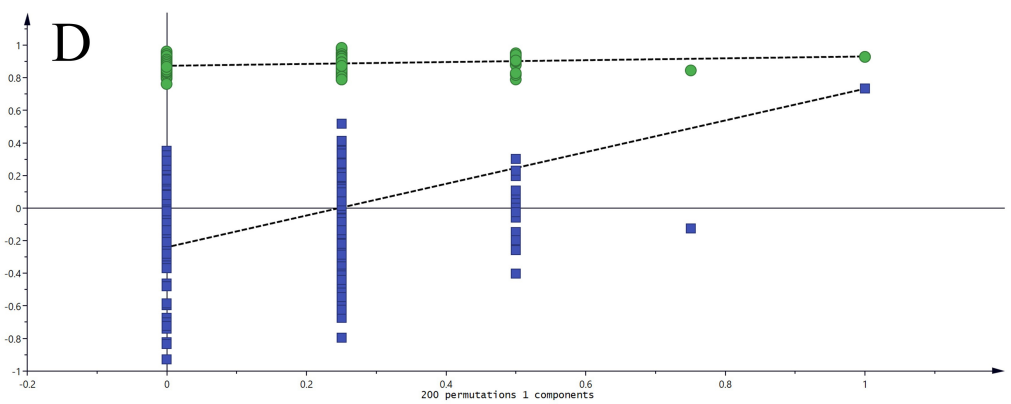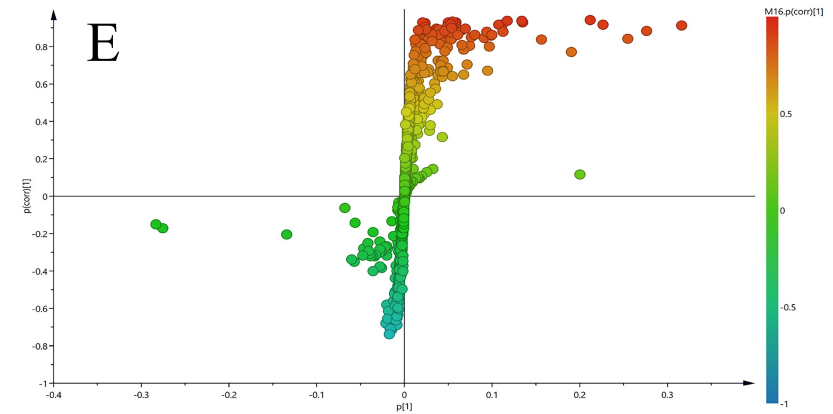

Supplement: d2fo00008c5.pdf [file d2fo00008c5.pdf]
